# Supplementary material for: Thioredoxin-interacting protein deficiency protects against severe acute pancreatitis by suppressing apoptosis signal-regulating kinase 1
Source: PubMed Central journal article supplement (PMC9622726; doi:10.1038/s41419-022-05355-x), 2022-10-31

**Fig.1.**

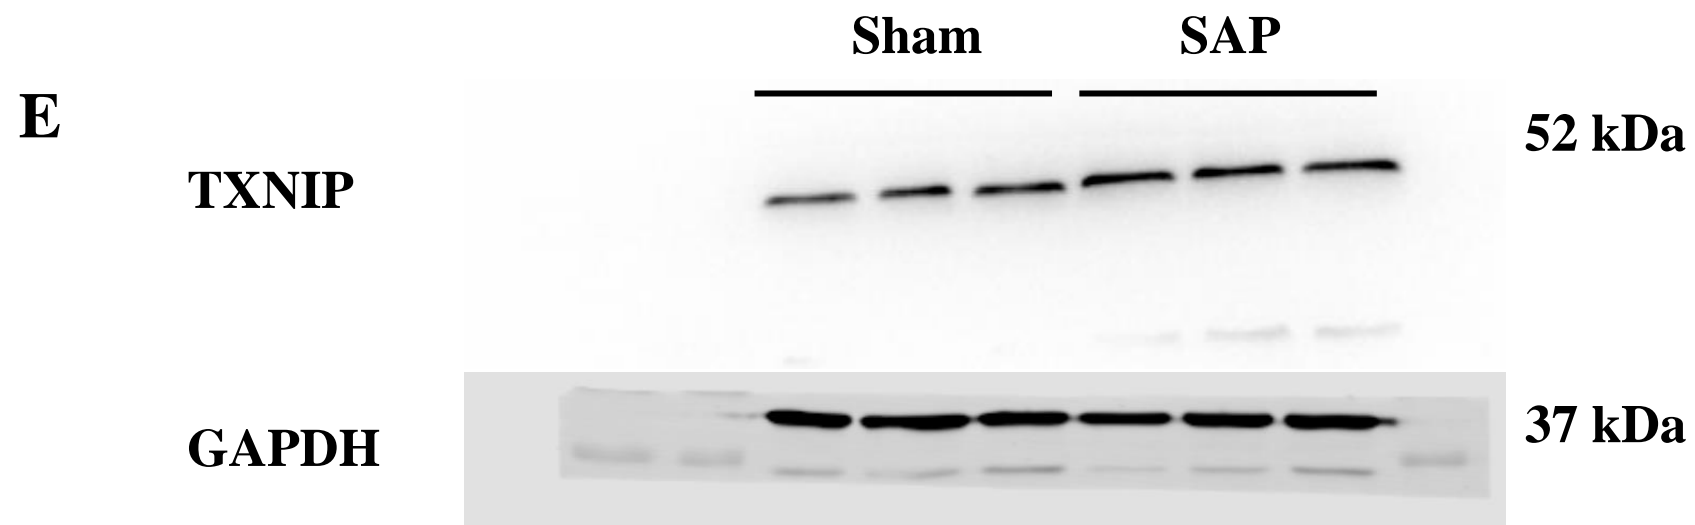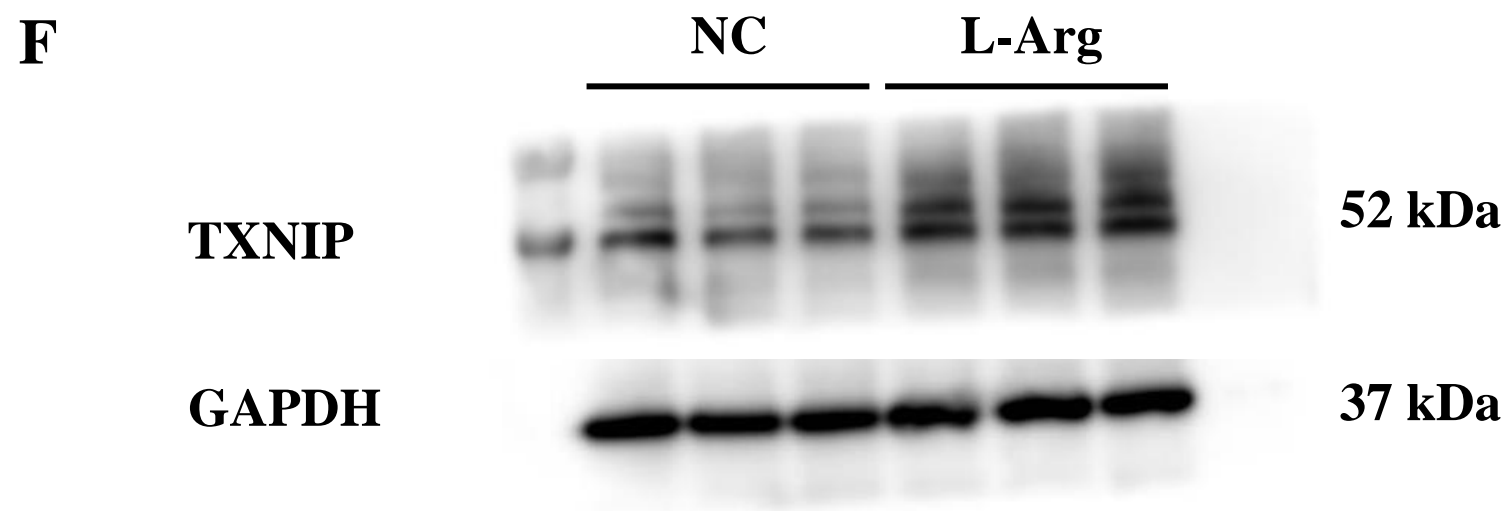

**Fig. 2.**

**B**

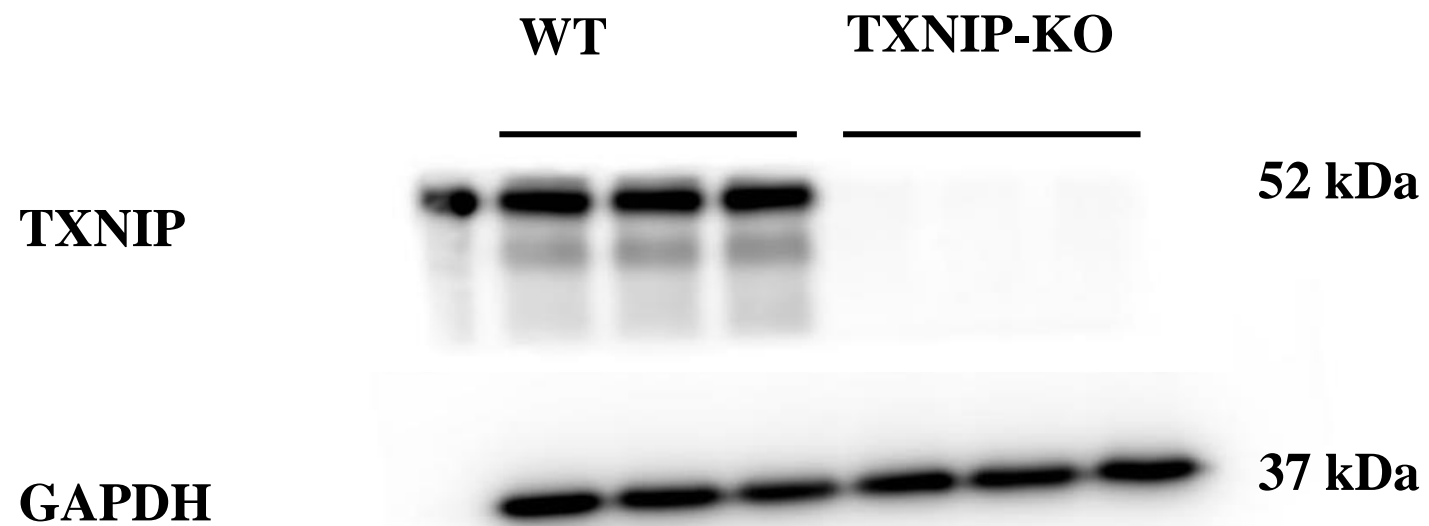

**Fig. 5.**

**E**

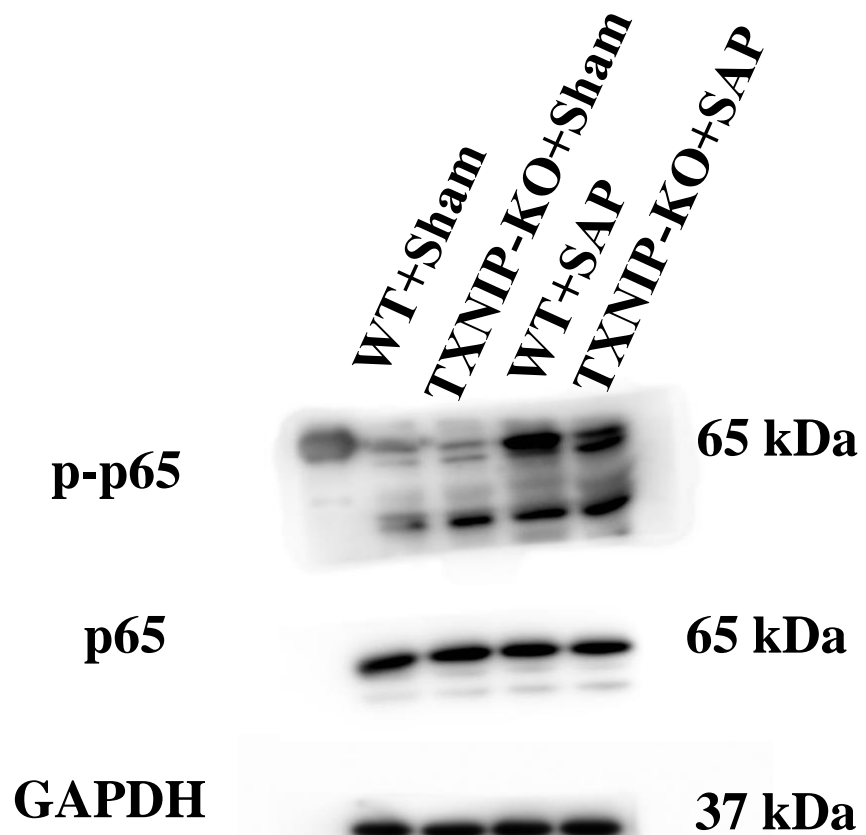

**F**

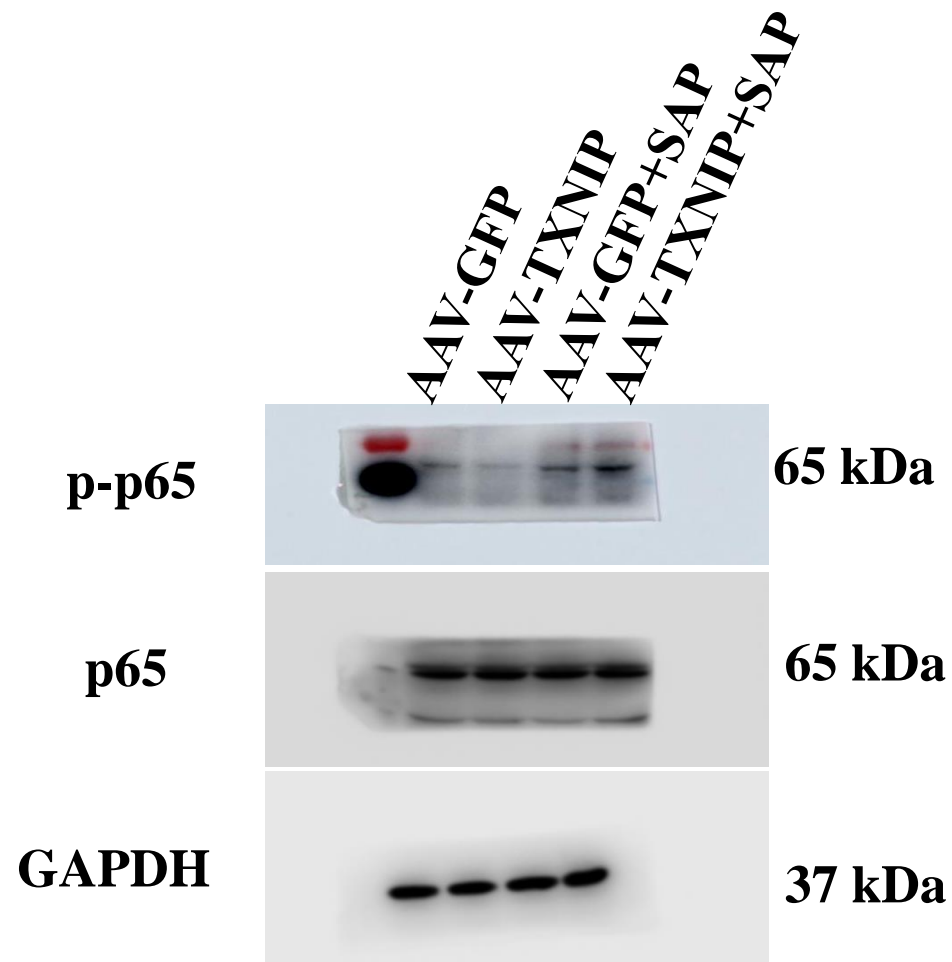

**Fig. 6.**

**E**

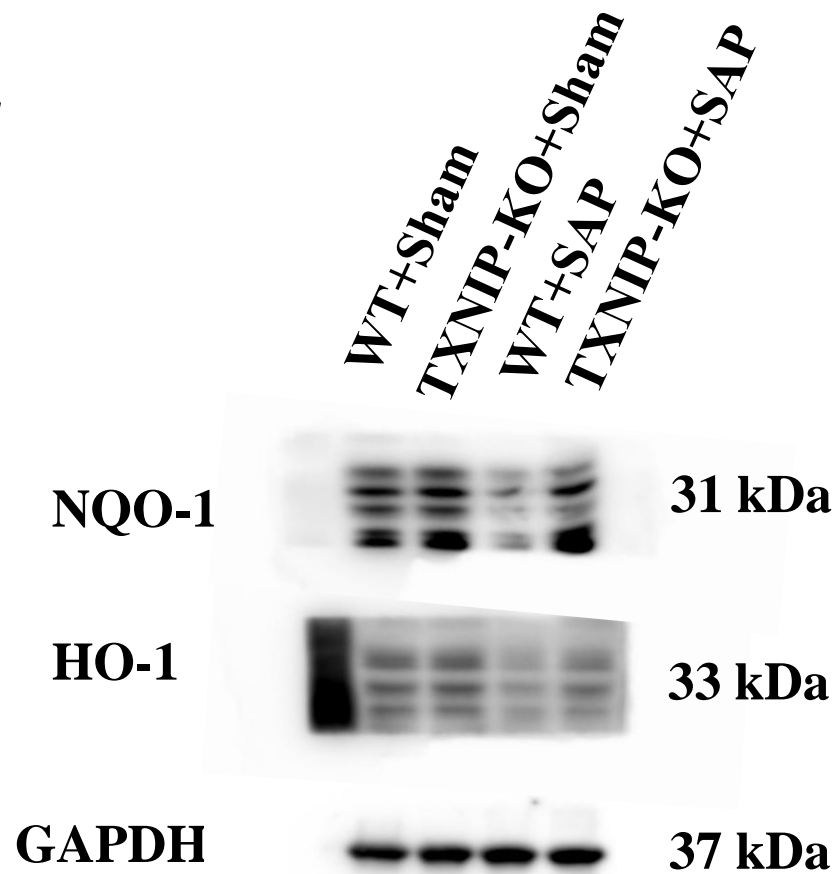

**F**

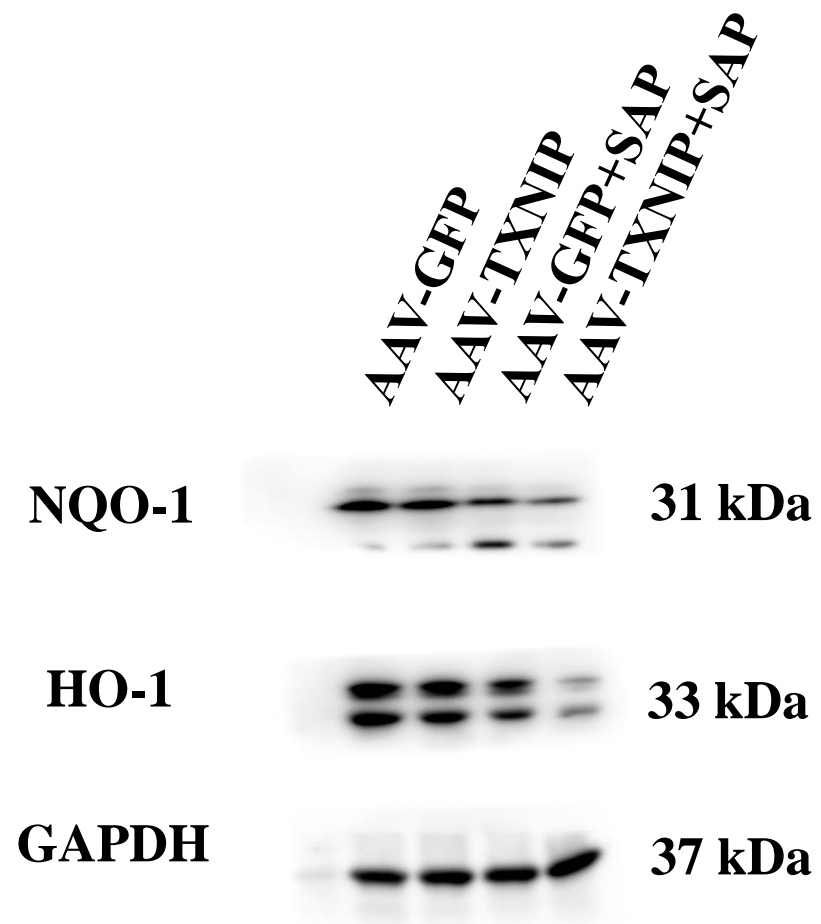

**Fig. 7.**

**A**

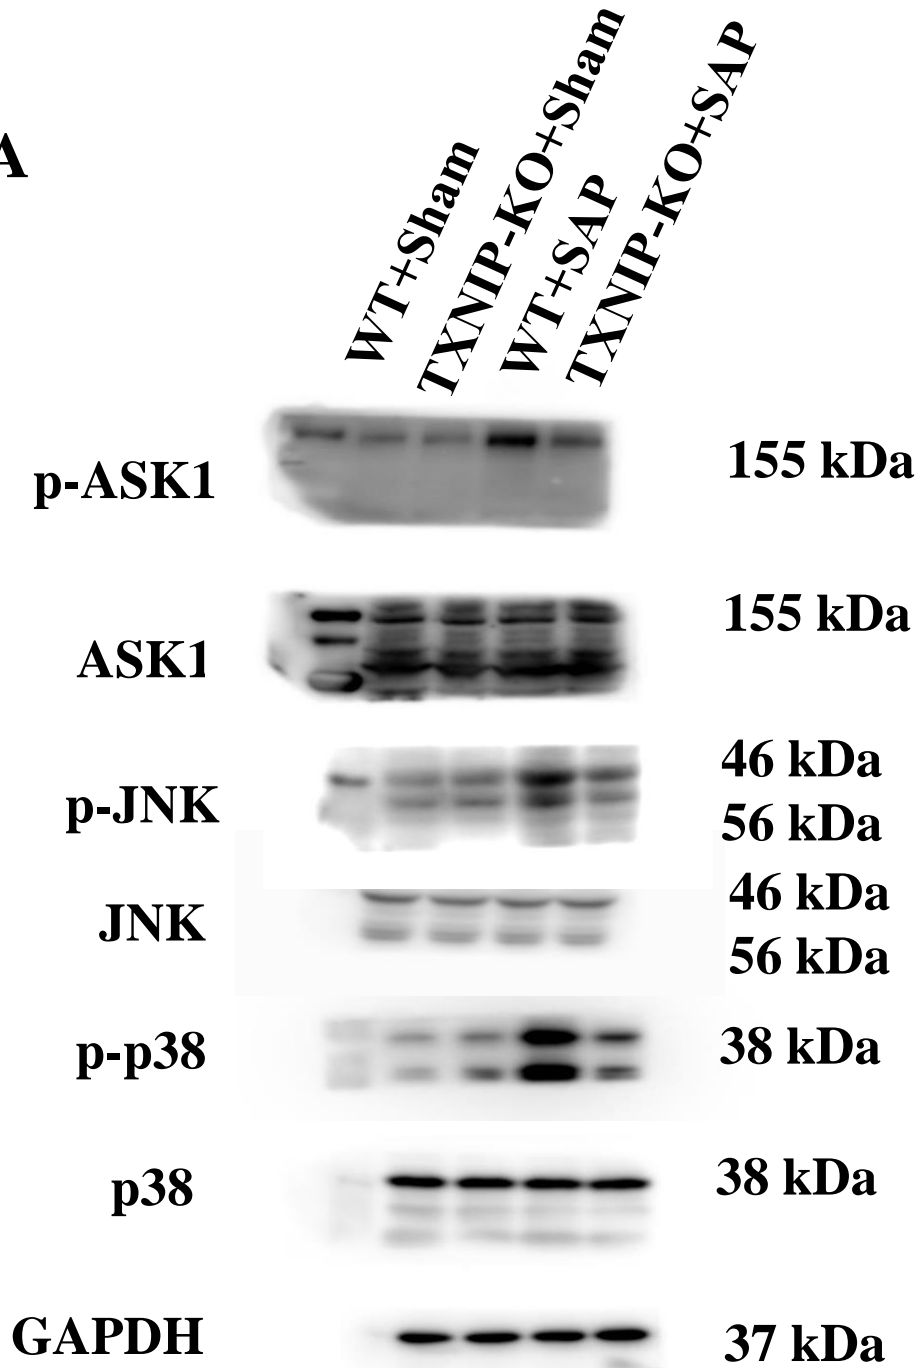

**B**

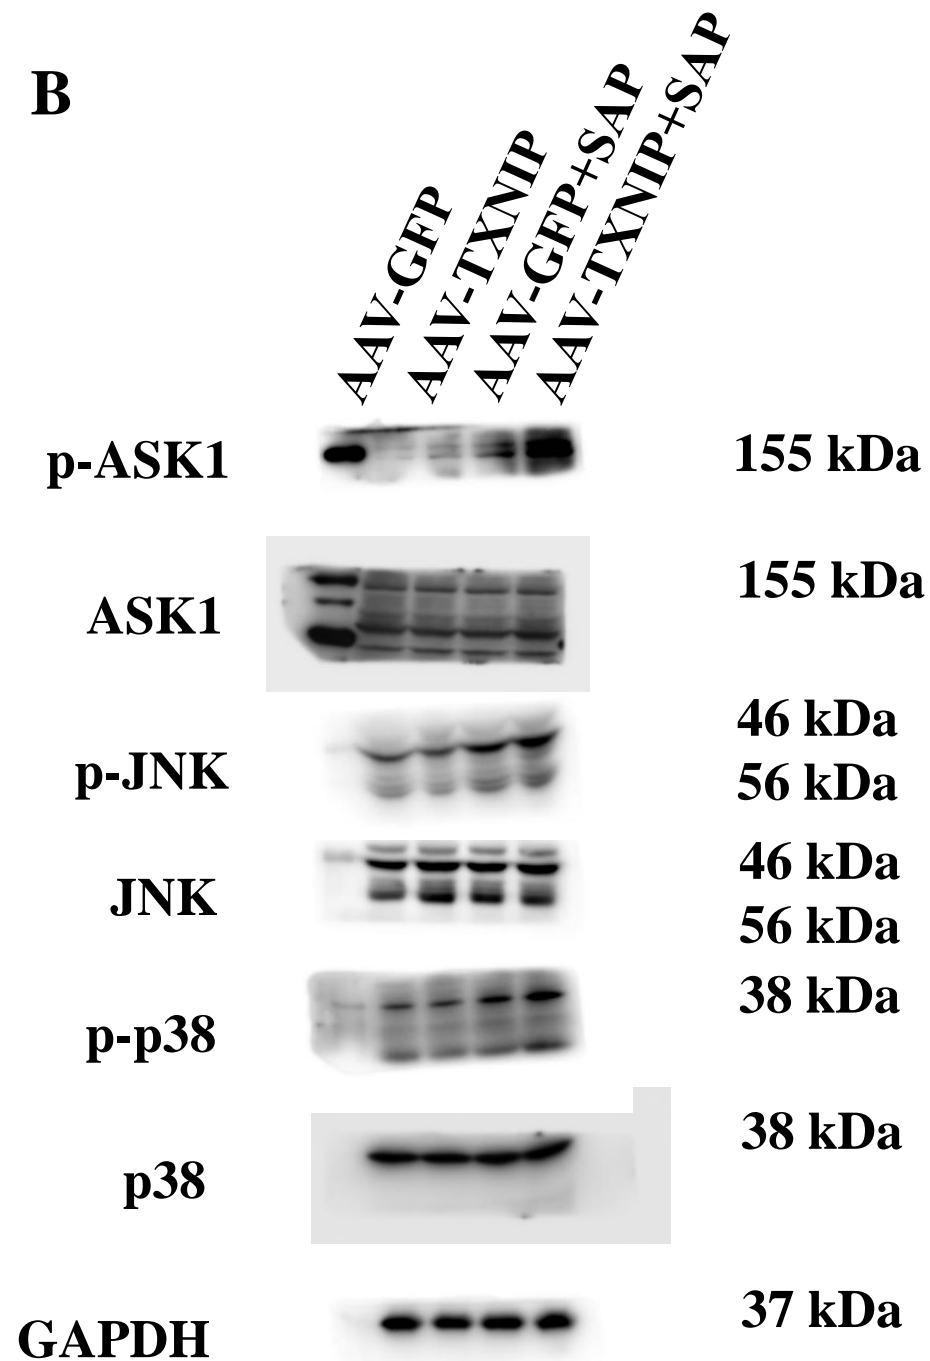

**Fig. 7.**

**C**

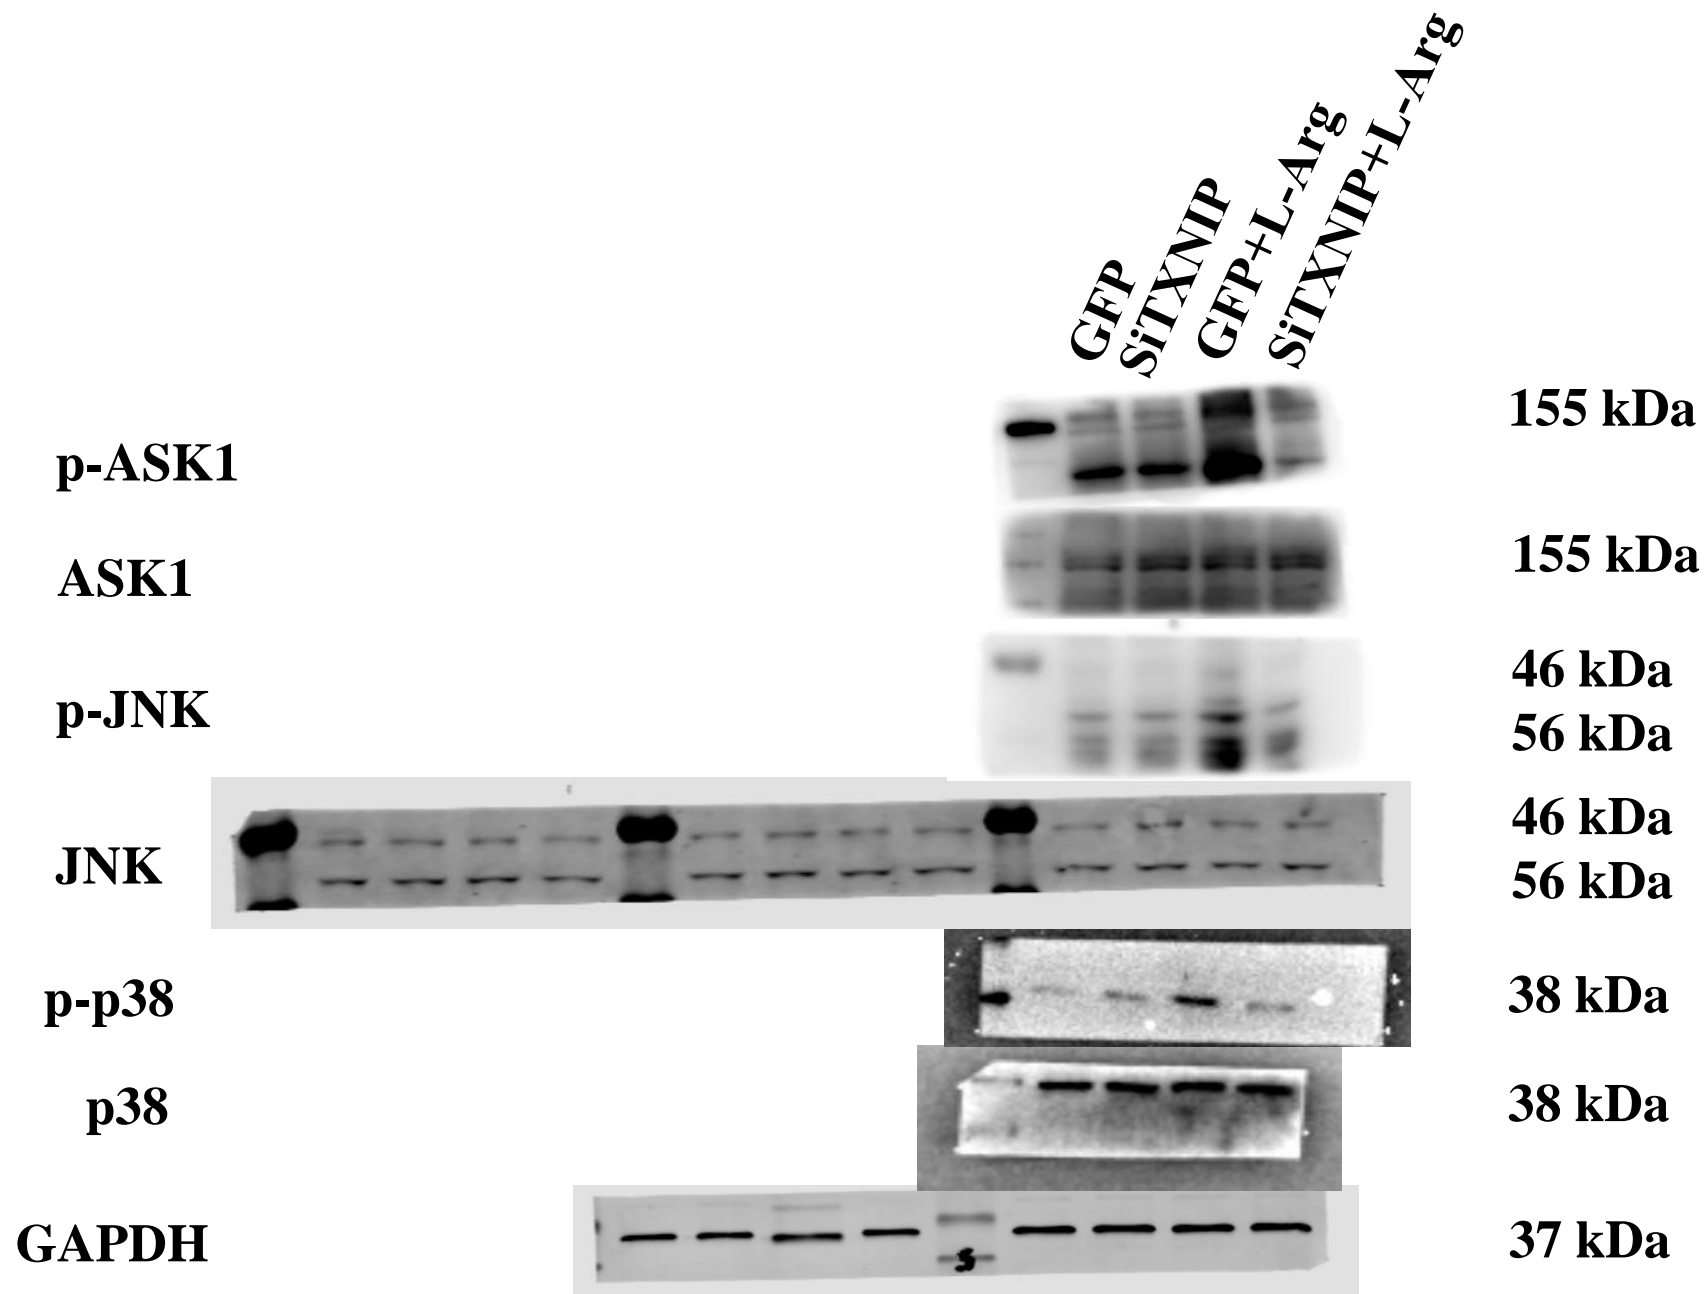

**Fig. 8.**

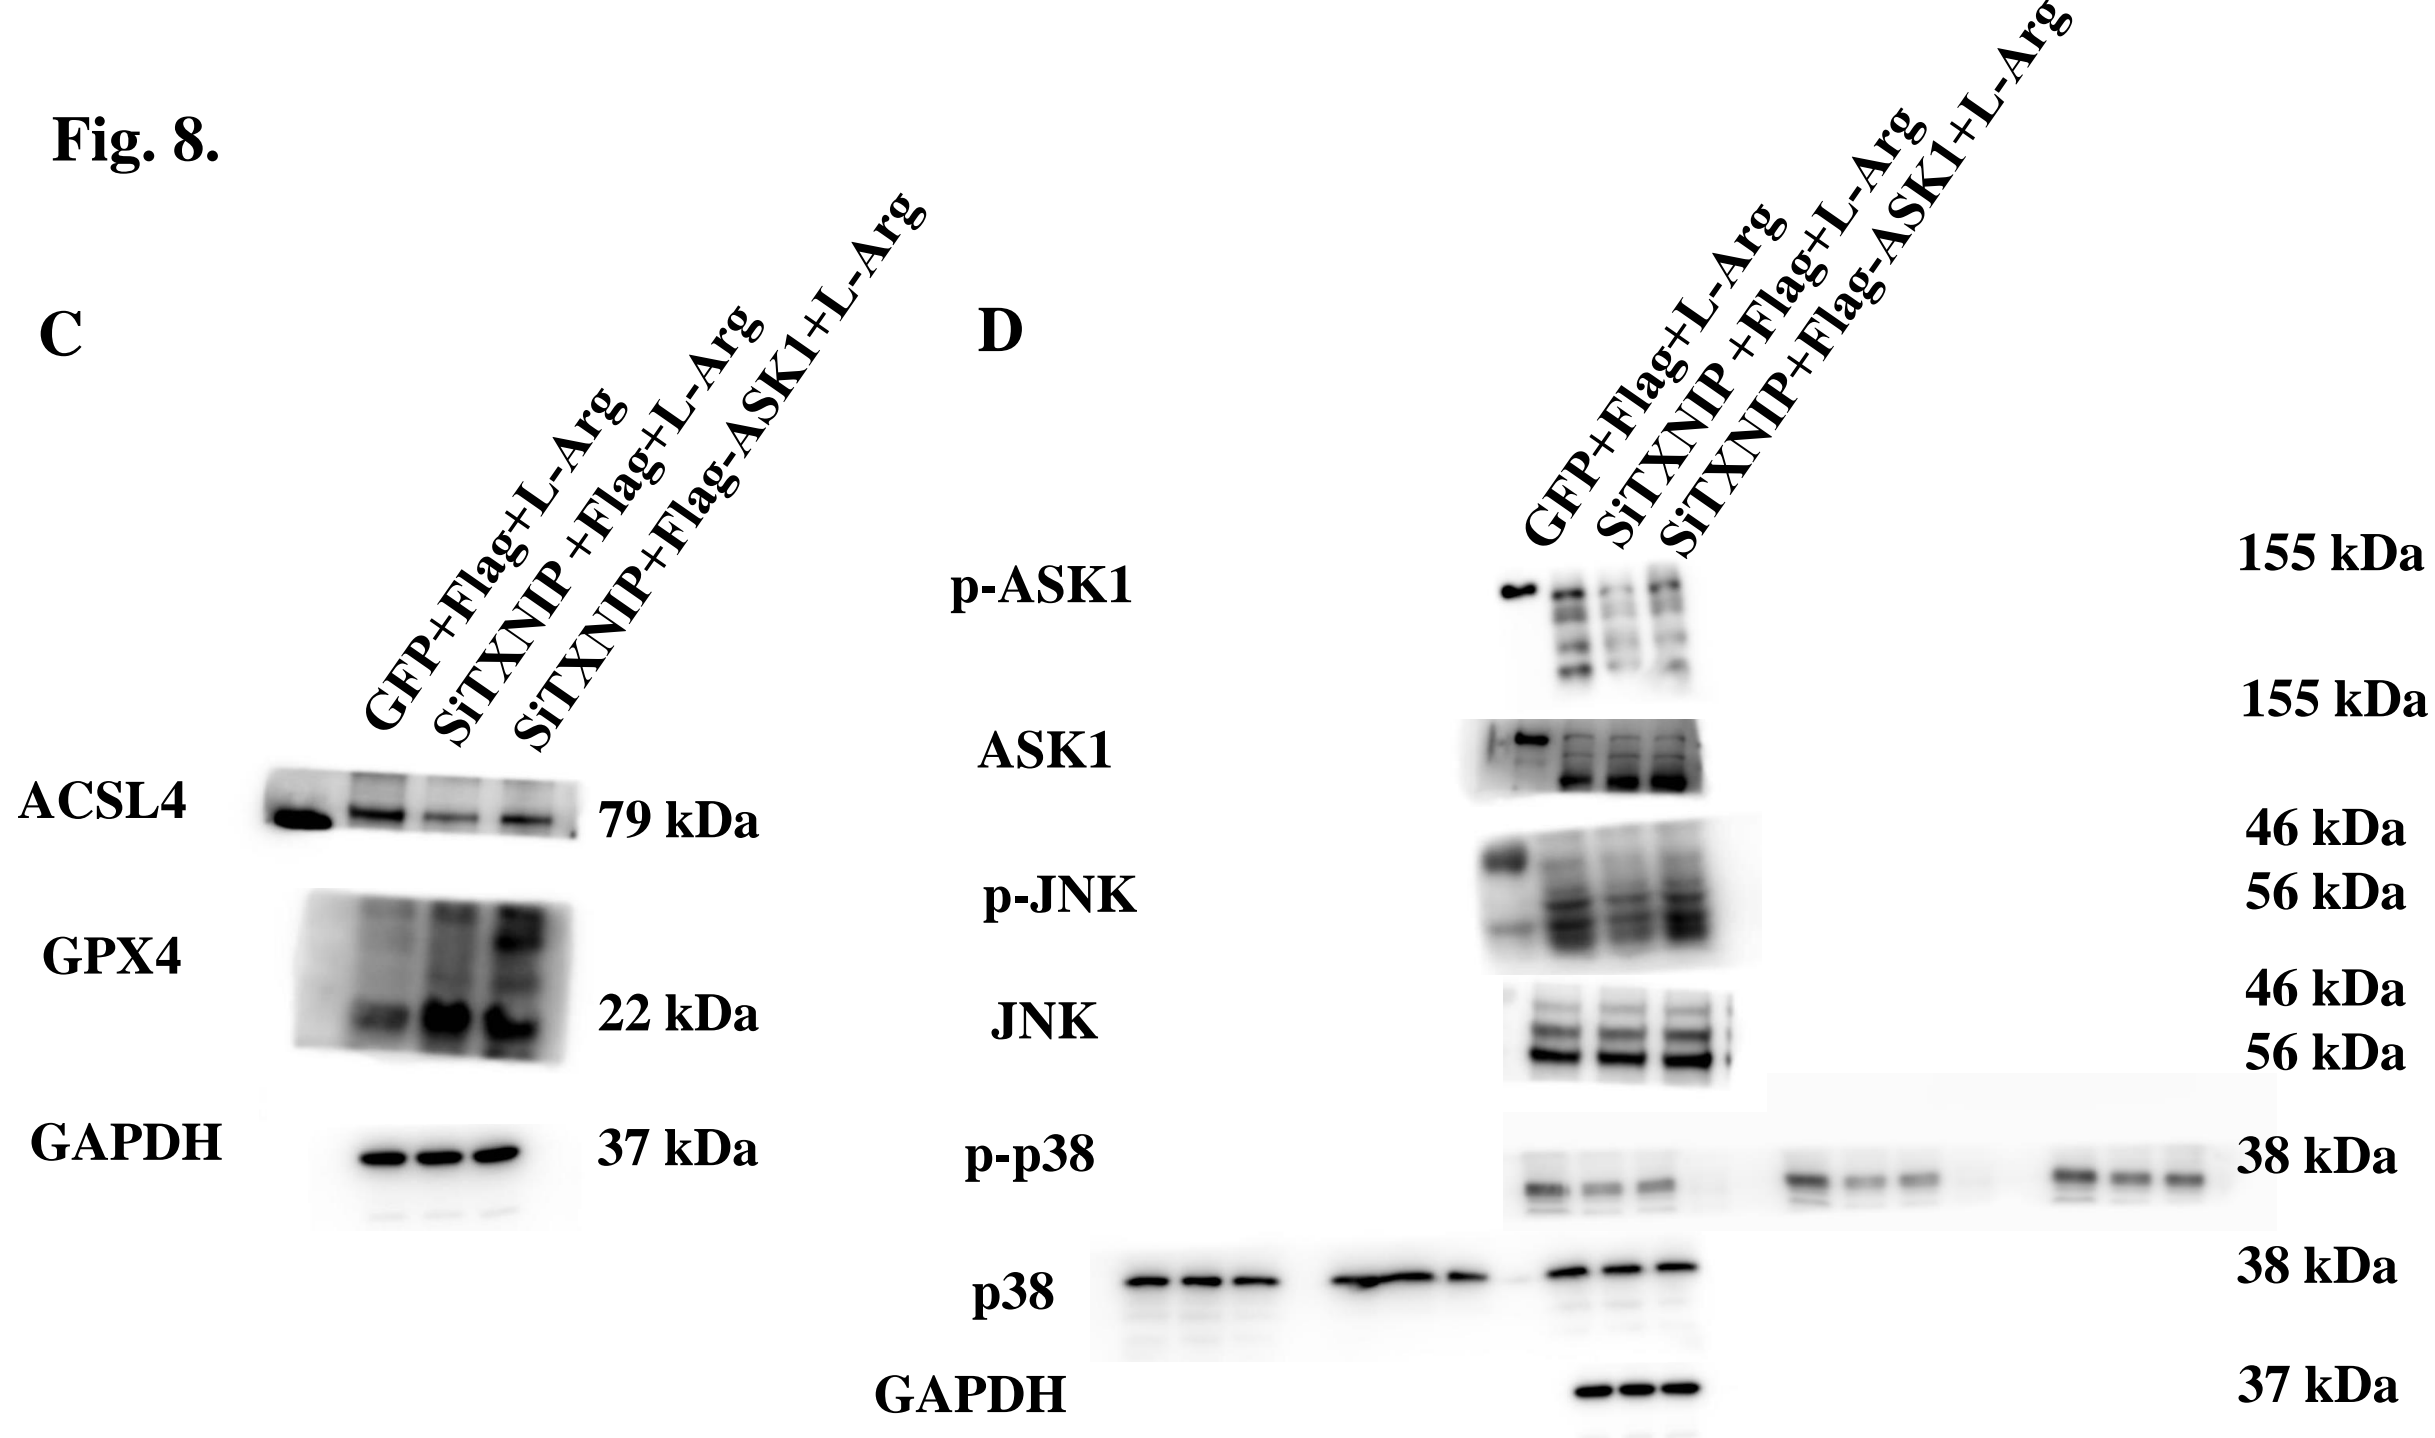

**Fig. 9.**

**F**

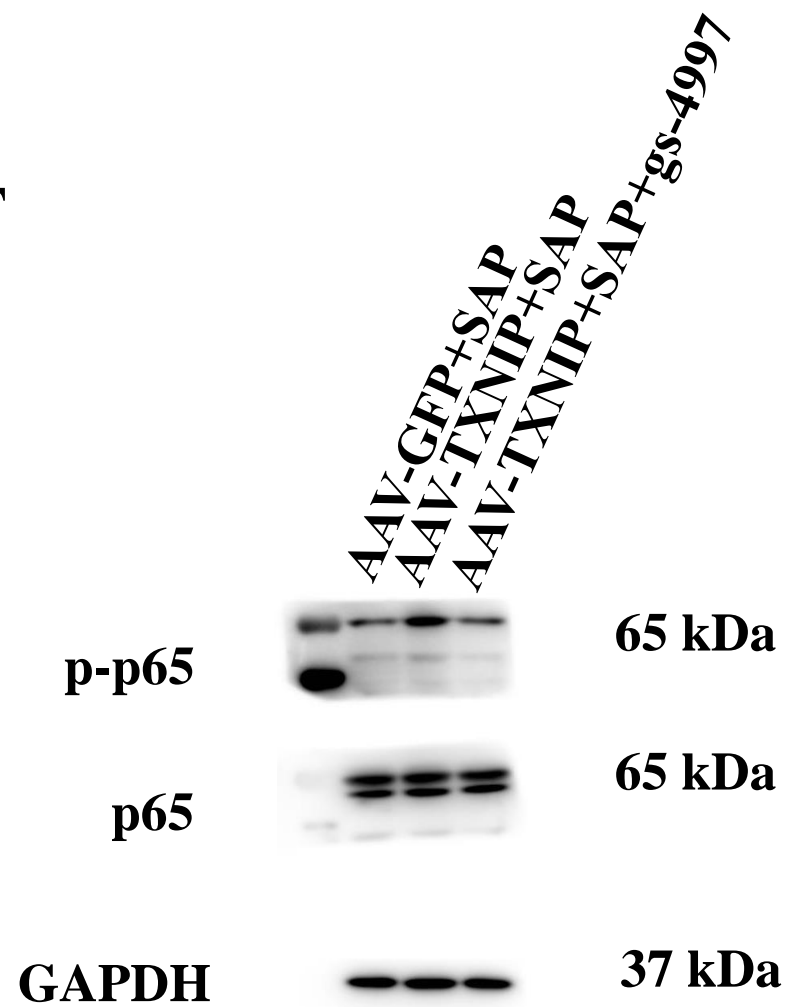



**Fig. 10.**

**E**

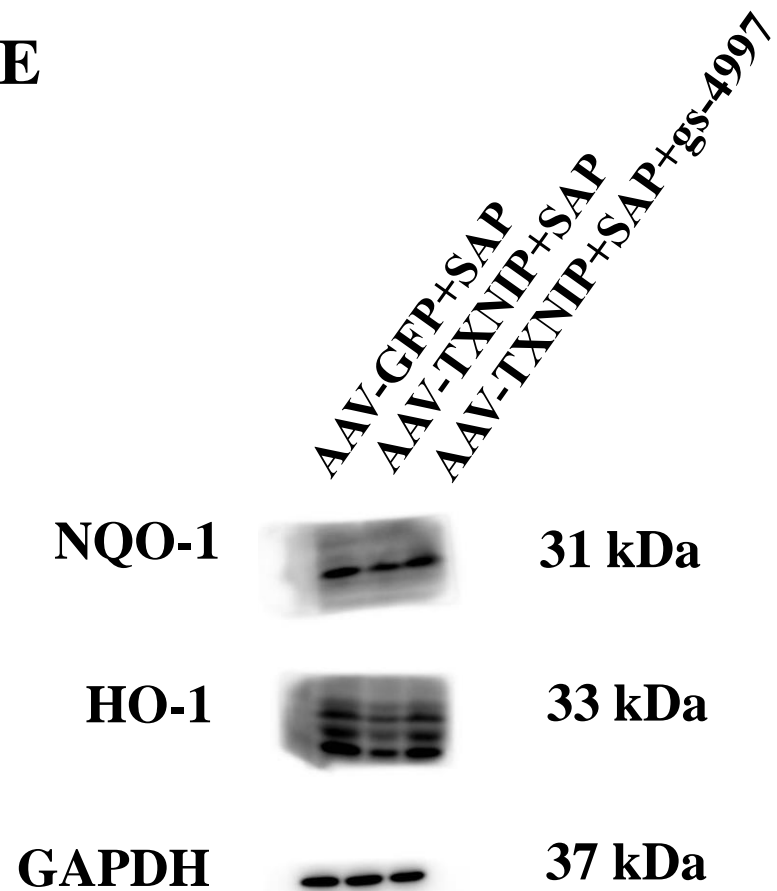

**F**

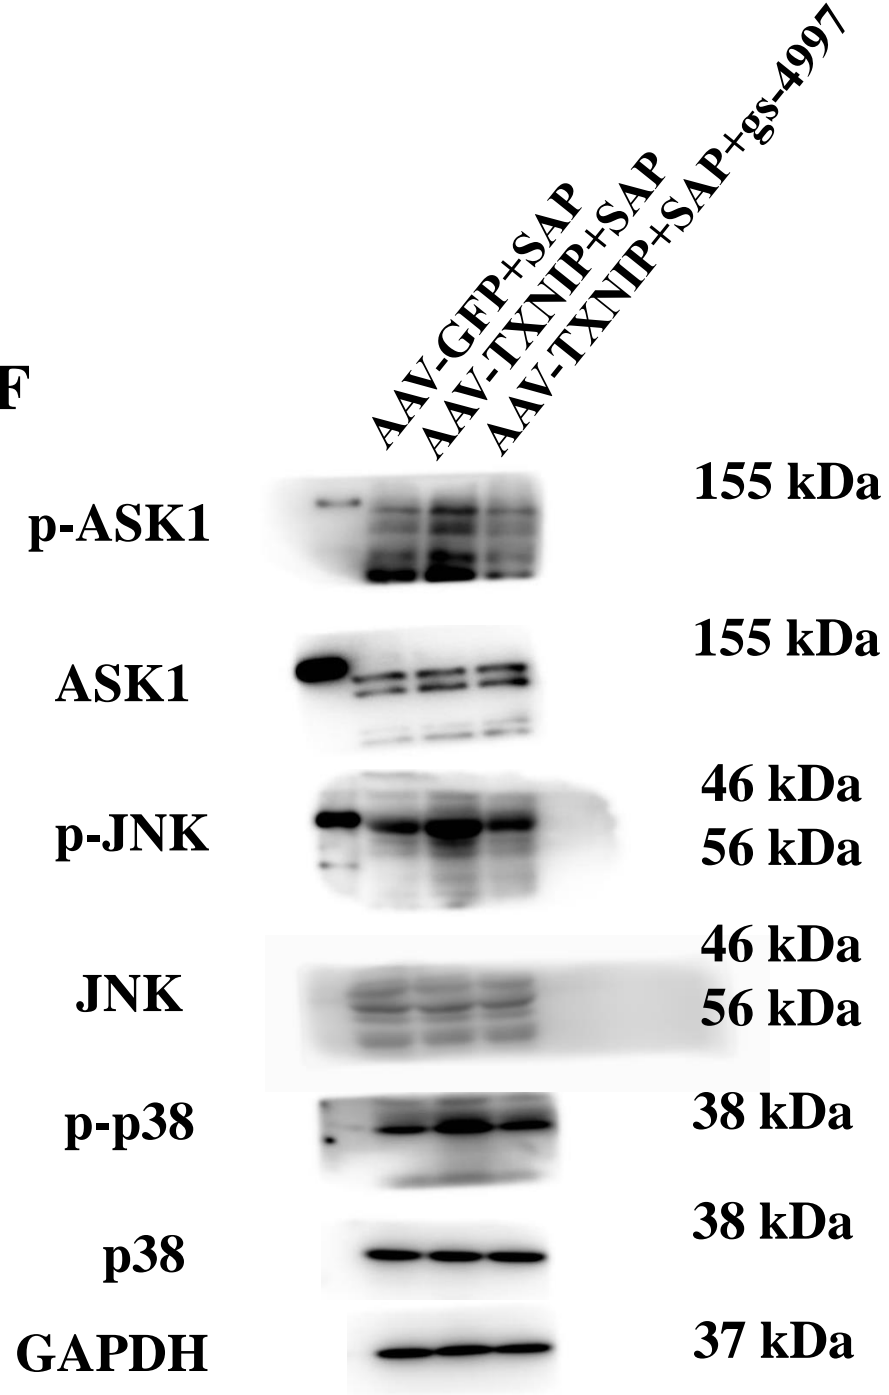

Supplement: 41419_2022_5355_MOESM1_ESM.pdf [file 41419_2022_5355_MOESM1_ESM.pdf]
