# Supplementary material for: Thioredoxin-interacting protein deficiency protects against severe acute pancreatitis by suppressing apoptosis signal-regulating kinase 1
Source: PubMed Central journal article supplement (PMC9622726; doi:10.1038/s41419-022-05355-x), 2022-10-31
Supplement: 41419_2022_5355_MOESM2_ESM.pdf [file 41419_2022_5355_MOESM2_ESM.pdf]

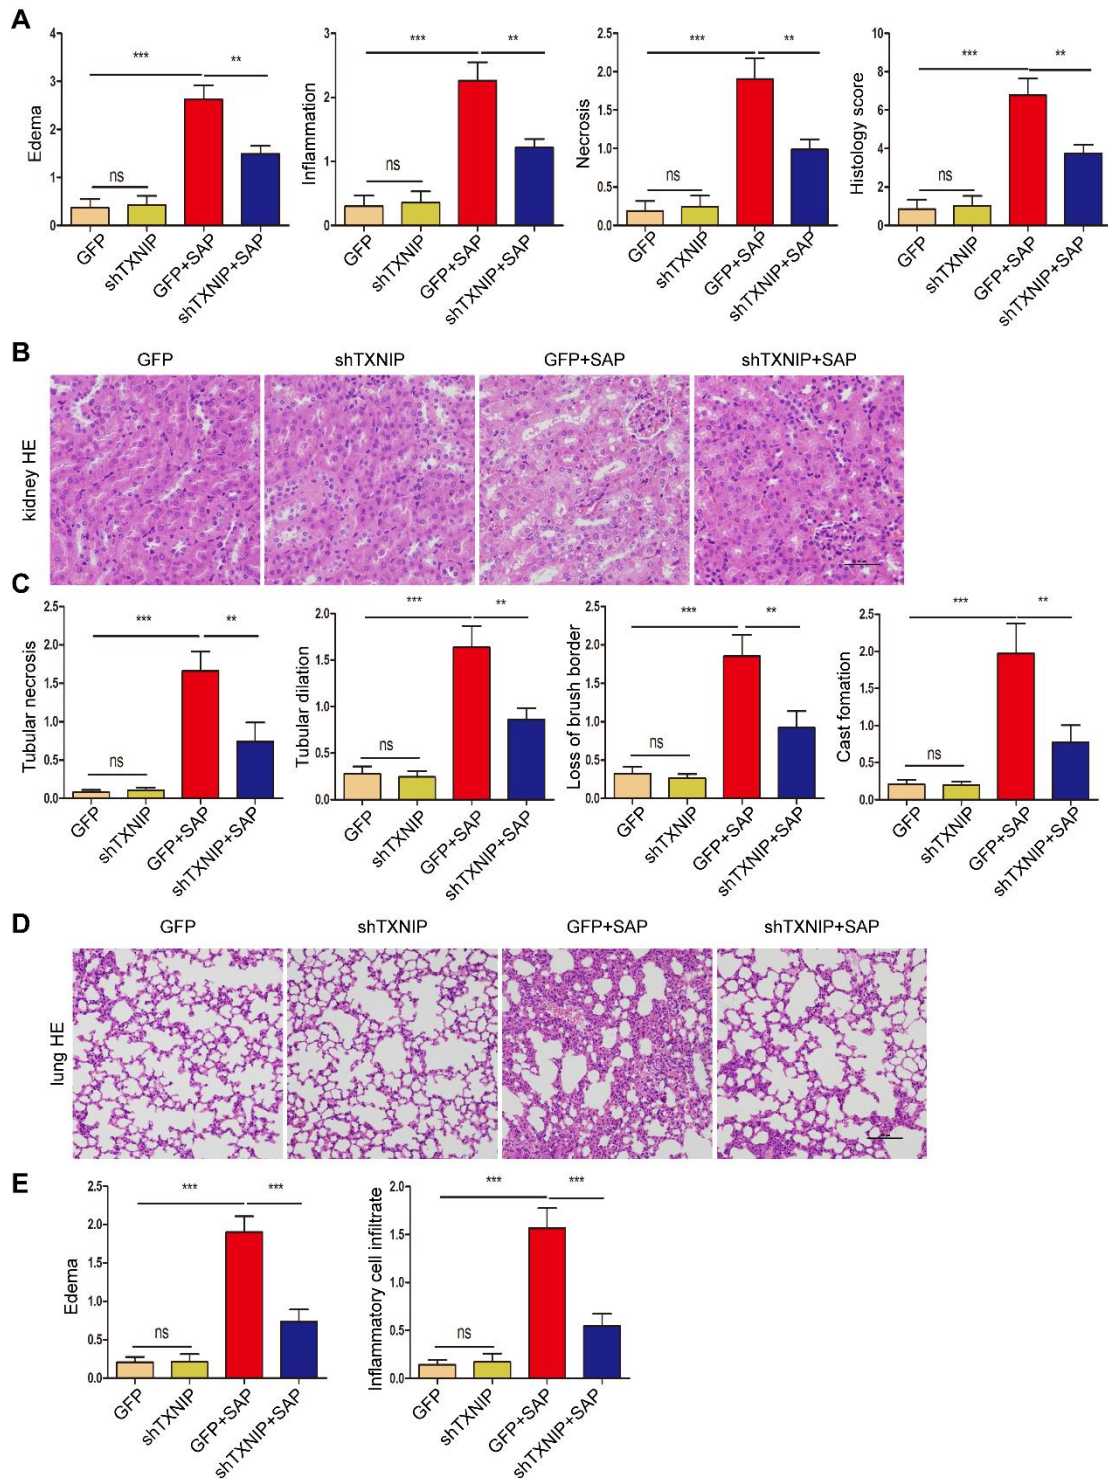

**Fig. S1. AAV-mediated TXNIP knockdown attenuated SAP in mice.** (A) Statistics showing pathological injury in the pancreas of mice in different group (n = 6 / group). (B) Representative histological H&E staining images in kidney of mice in different group. (n = 6 / group). Scale bar = 50 $\mu$ m. (C) Statistics showing pathological injury in the kidney of mice in different group (n = 6 / group). (D) Representative histological H&E staining images in lung of mice in different group. (n = 6 / group). Scale bar

=100 $\mu$ m. (E) Statistics showing pathological injury in the lung of mice in different group (n = 6 / group). \*\*  $p < 0.01$ , \*\*\*  $p < 0.001$ , ns  $p > 0.05$ .

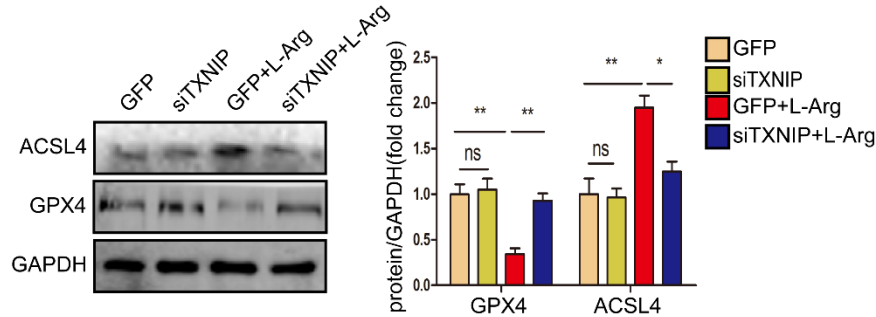

**Fig. S2. TXNIP mediates oxidative stress during SAP.** (A) Protein levels of GPX4 and ACSL4 in the AR42J cells induced by L-Arg in different group (representing three independent experiments). GAPDH as a loading control. \*  $p < 0.05$ , \*\*  $p < 0.01$ .

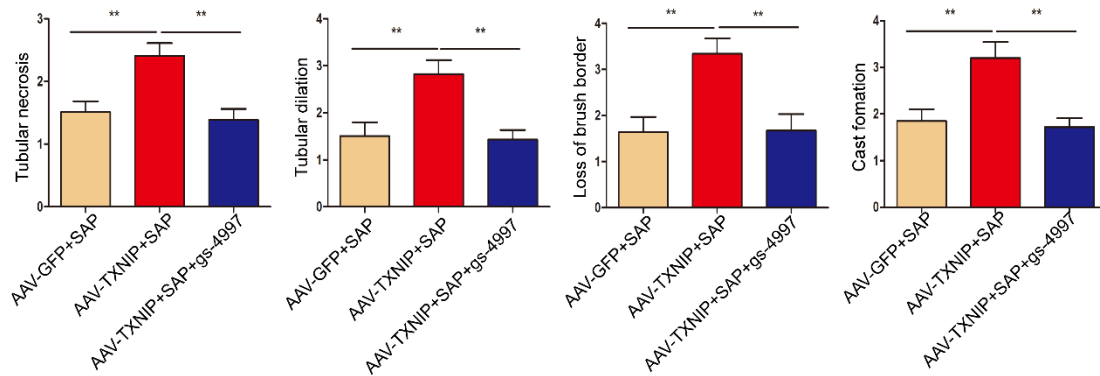

**Fig. S3. ASK1 mediated the effect of TXNIP on oxidative stress during SAP.** (A) Statistics showing pathological injury in the kidney of mice in different group (n = 6 / group). \*\*  $p < 0.01$ .
